# Supplementary material for: Modification of magnetic mesoporous N-doped silica nanospheres by CuO NPs: a highly efficient catalyst for the multicomponent synthesis of some propellane indeno indole derivatives
Source: Royal Society of Chemistry journal article supplement (doi:10.1039/d2ra06221f), 2022-01-01
Supplement: d2ra06221f1.pdf [file d2ra06221f1.pdf]

## Supporting information

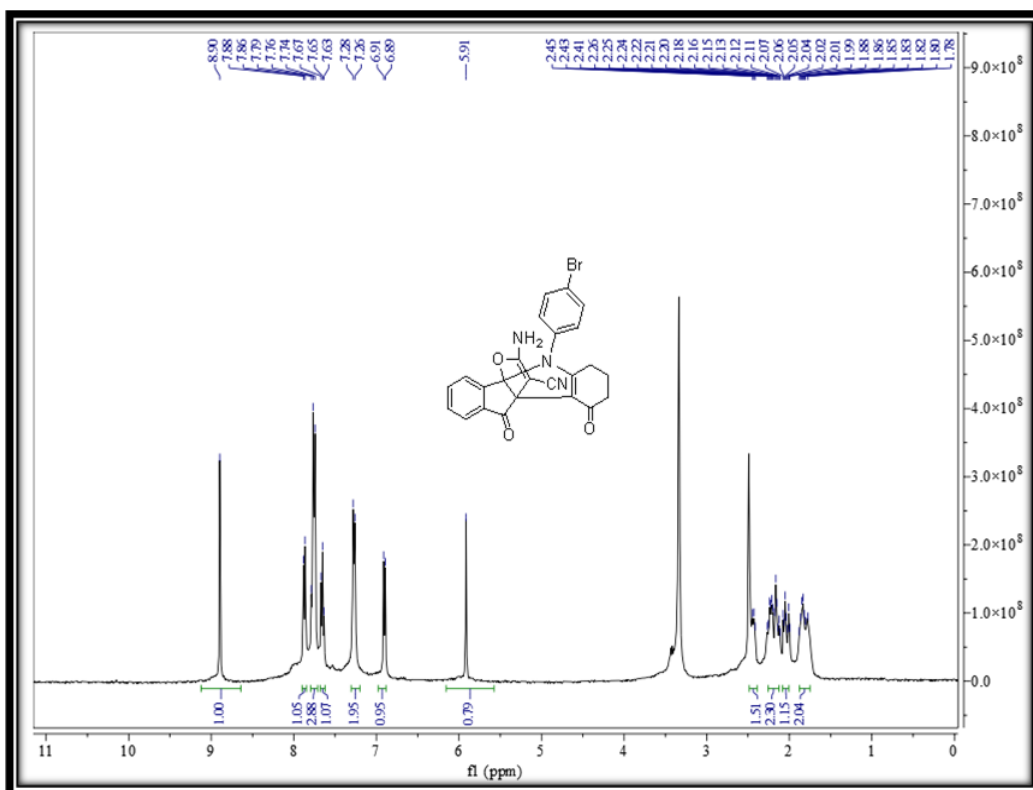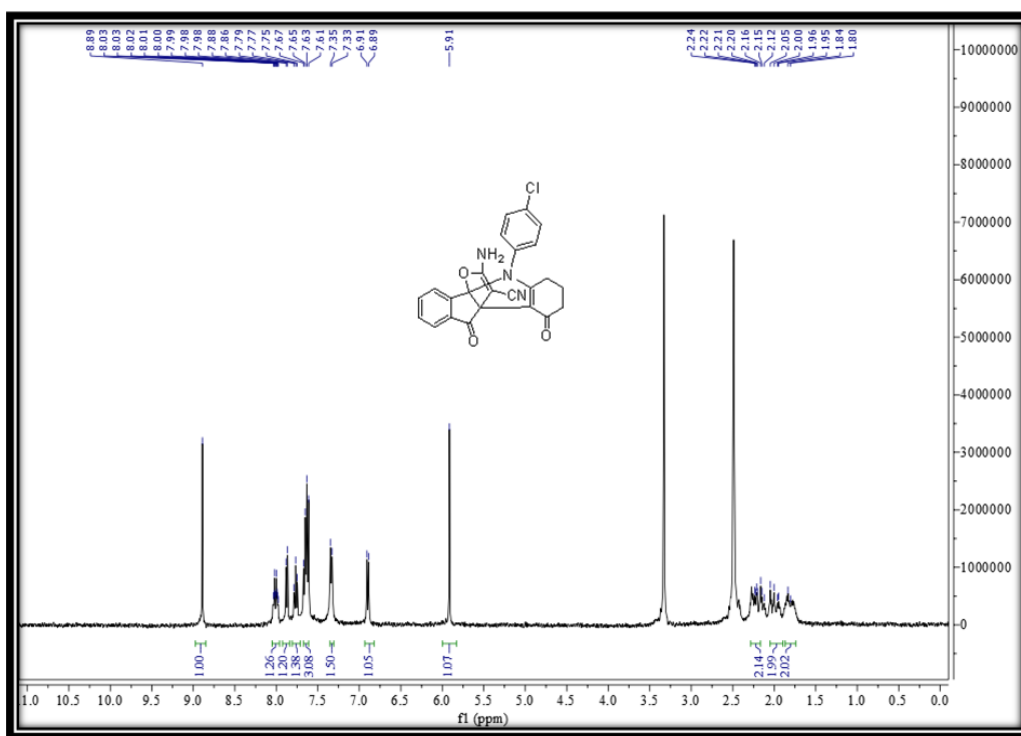

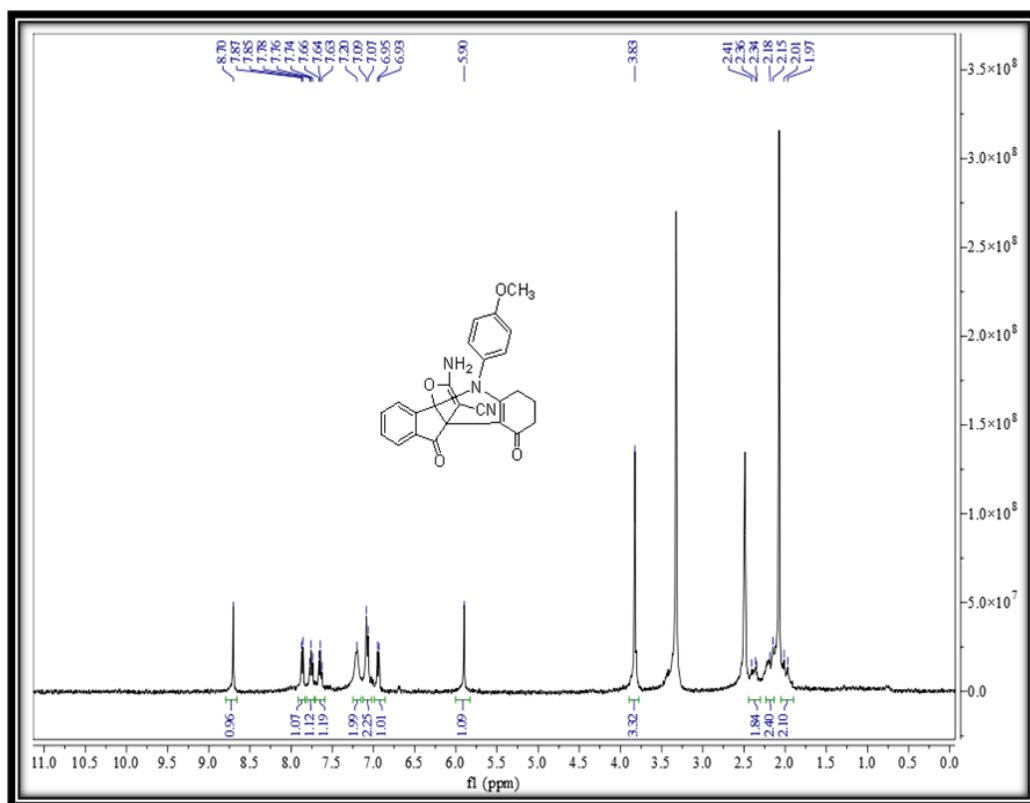

**<sup>1</sup>H NMR of 5c**

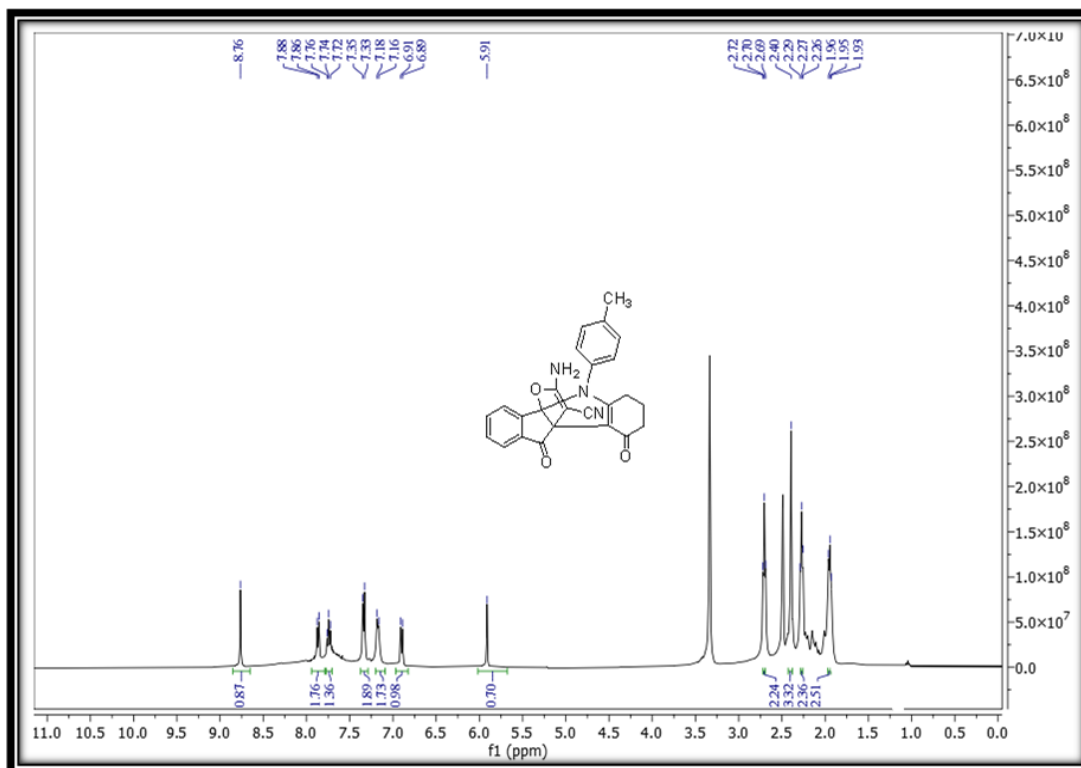

**<sup>1</sup>H NMR of 5d**

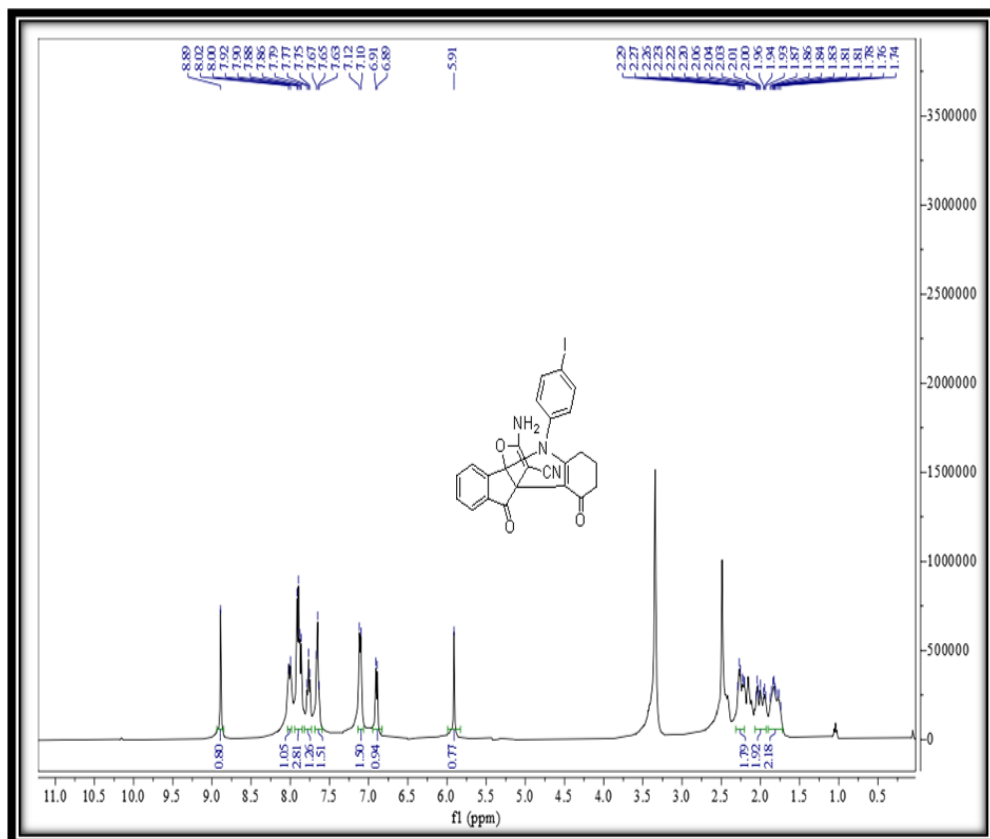

<sup>1</sup>H NMR of 5e

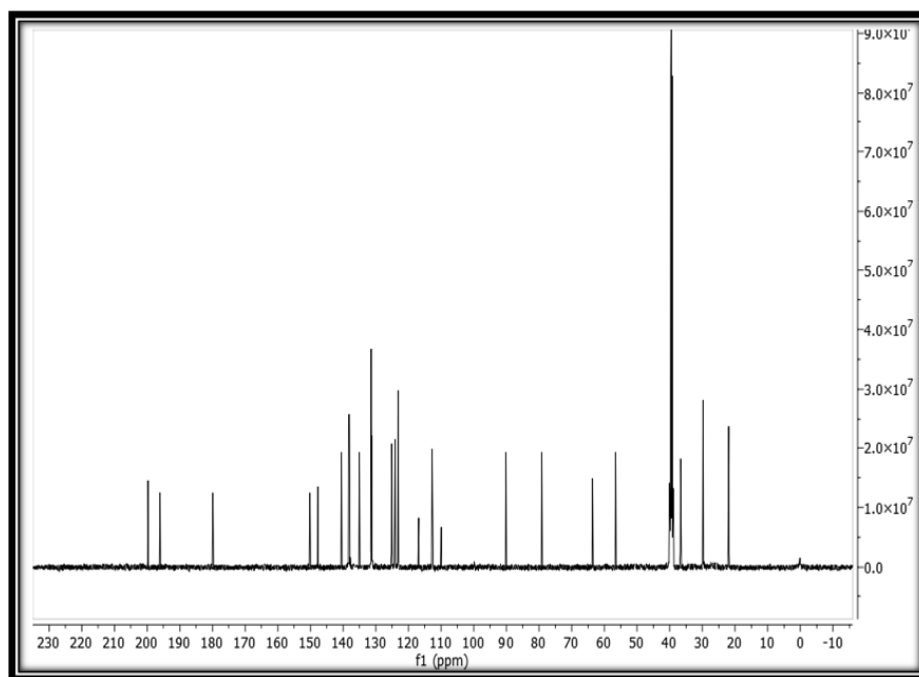

<sup>13</sup>C NMR of 5e

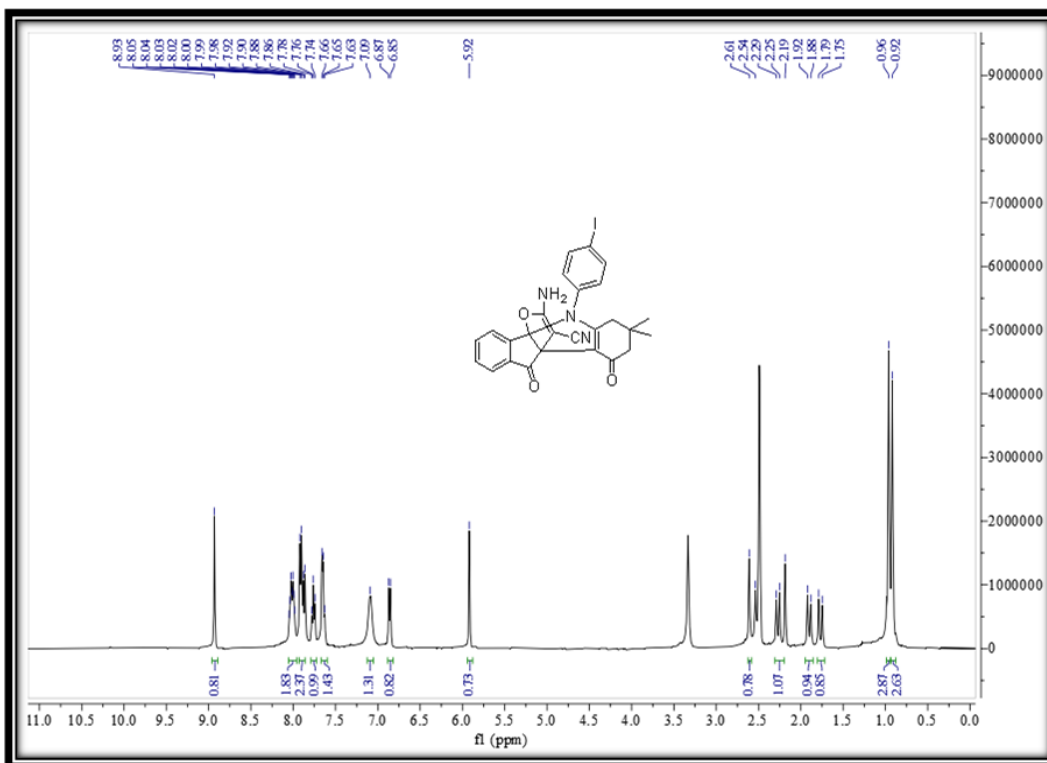

<sup>1</sup>H NMR of 5f

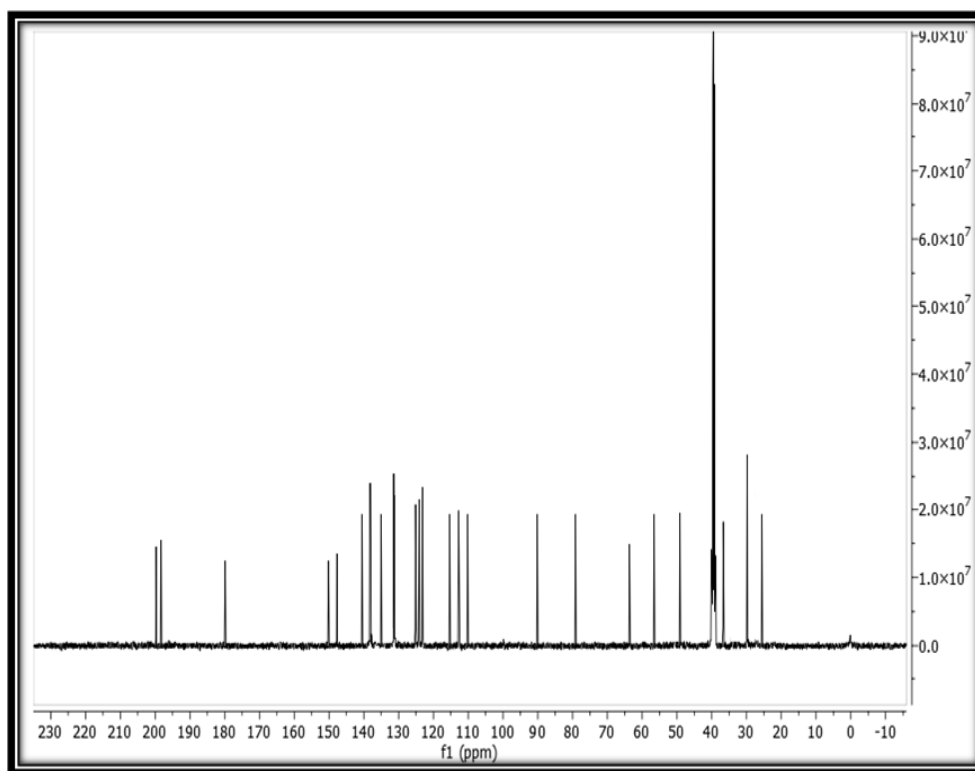

<sup>13</sup>C NMR of 5f

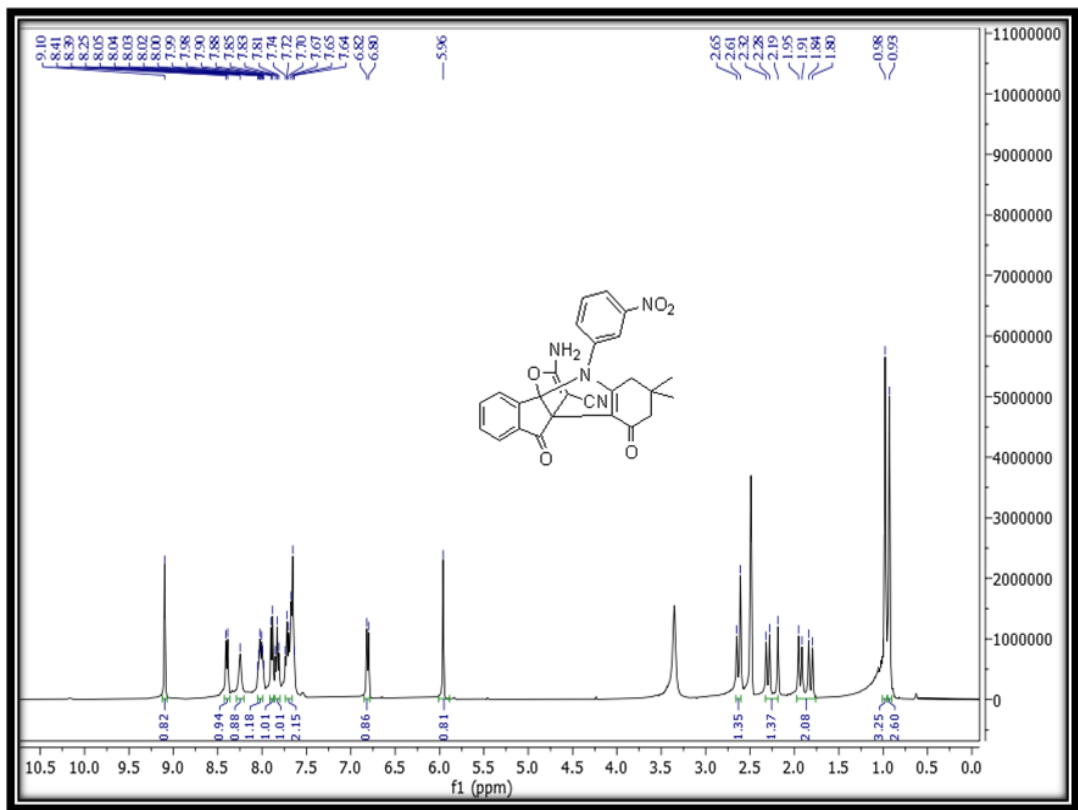

**$^1\text{H}$  NMR of 5g**

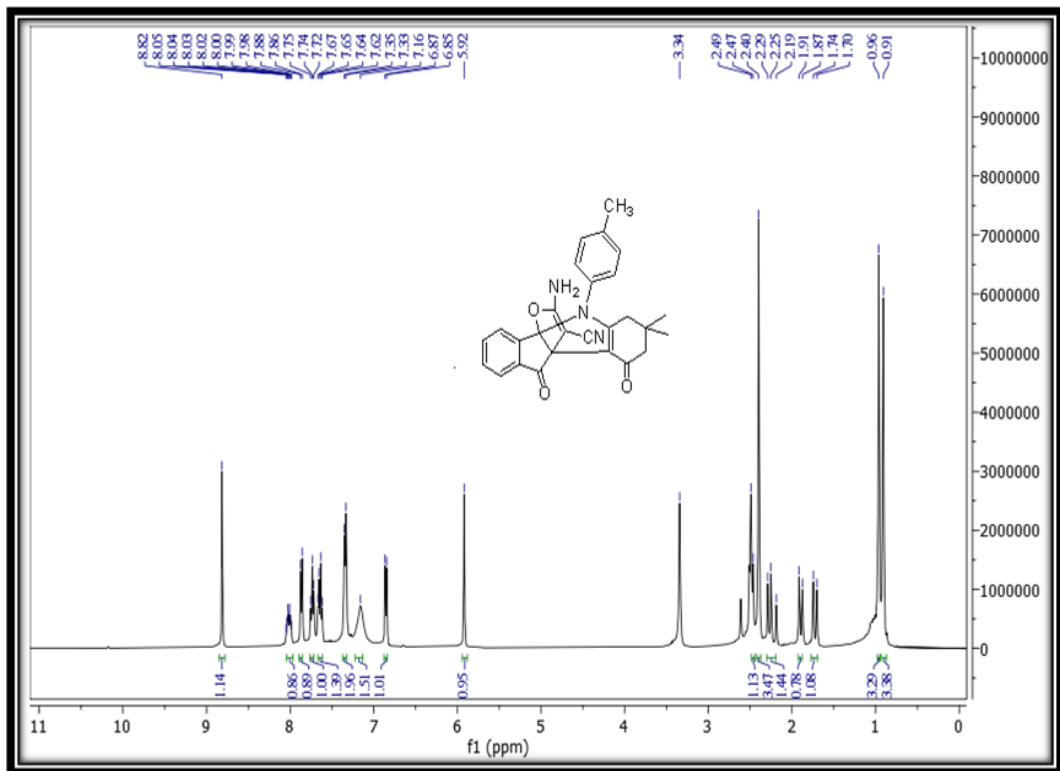

**$^1\text{H}$  NMR of 5h**

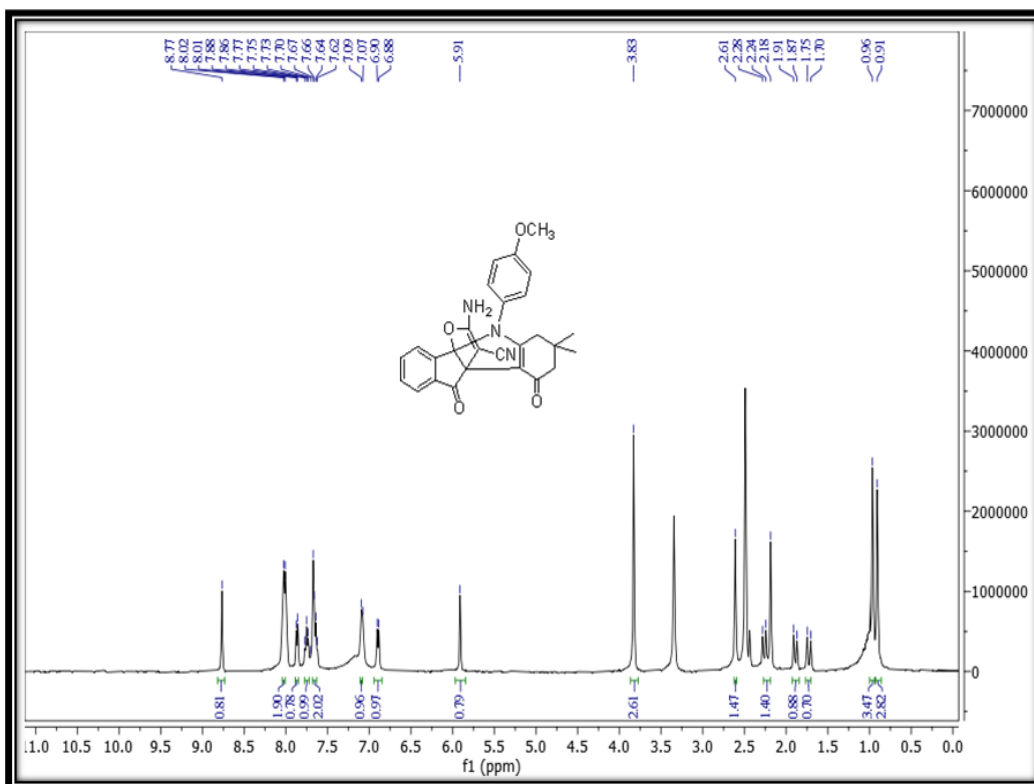

**<sup>1</sup>H NMR of 5i**

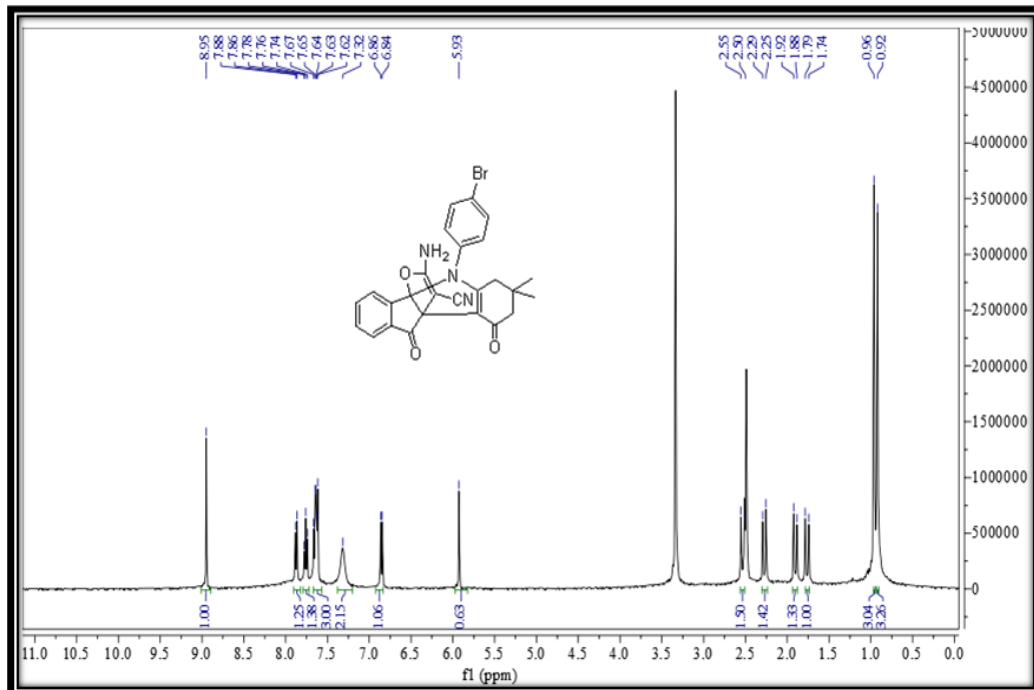

**<sup>1</sup>H NMR of 5j**

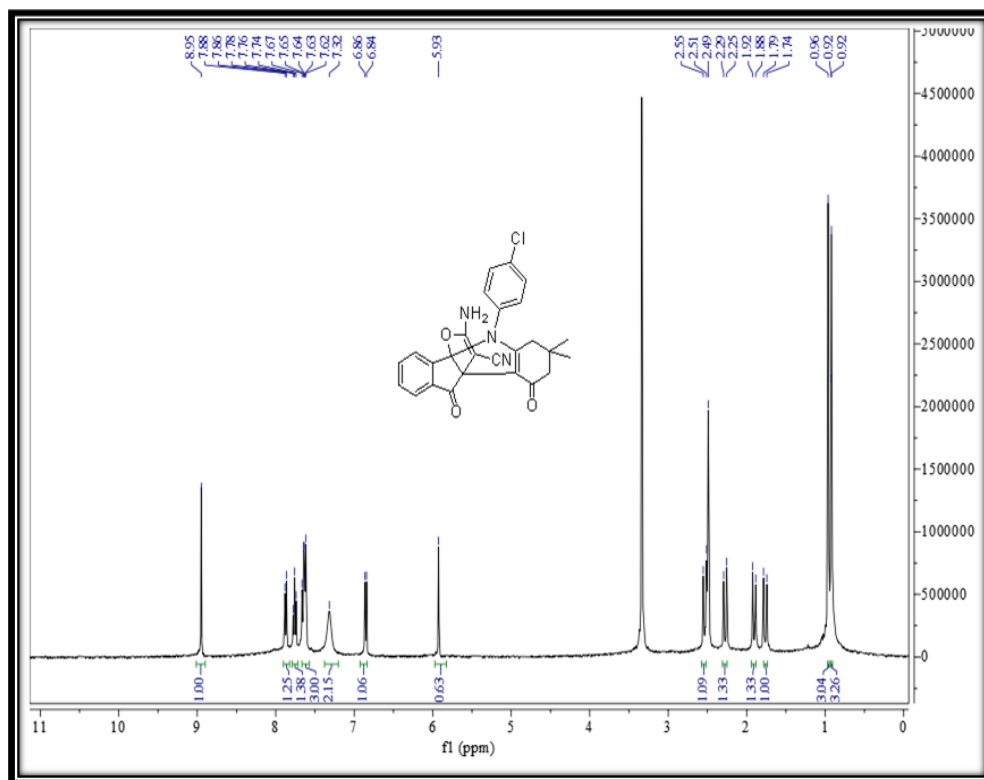

**<sup>1</sup>H NMR of 5k**

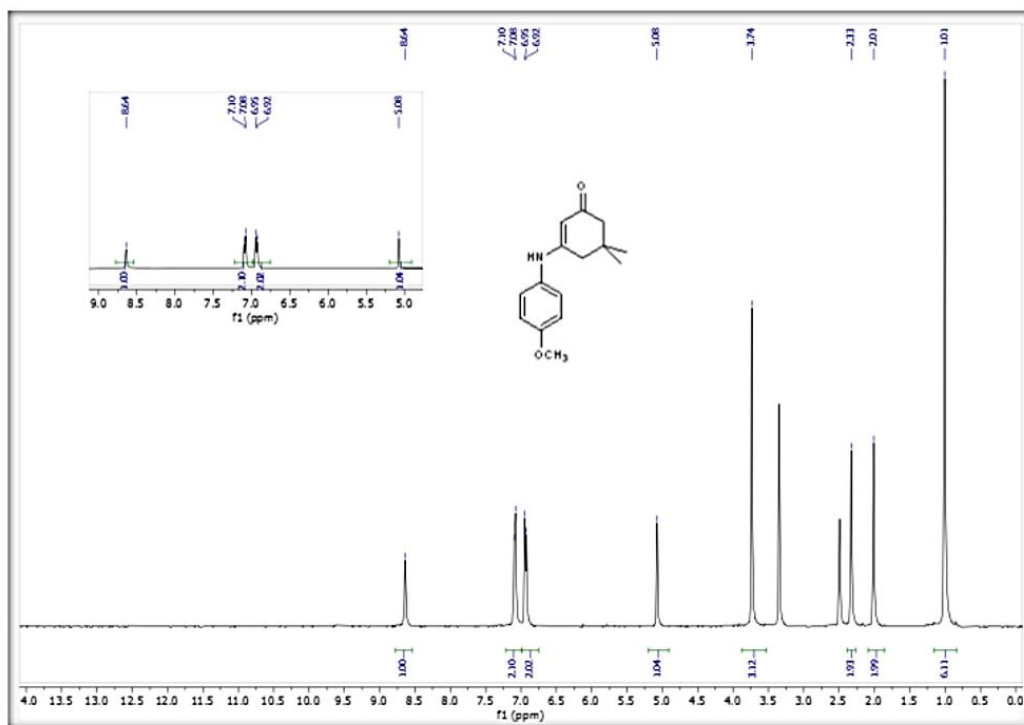

**<sup>1</sup>H NMR of intermediate I**
